# Supplementary material
Source: publisher figshare collection journal article supplement (https://gsajournals.figshare.com/articles/dataset/_/14394353)
Supplement: Supplementary file 1 [file 1]

**A**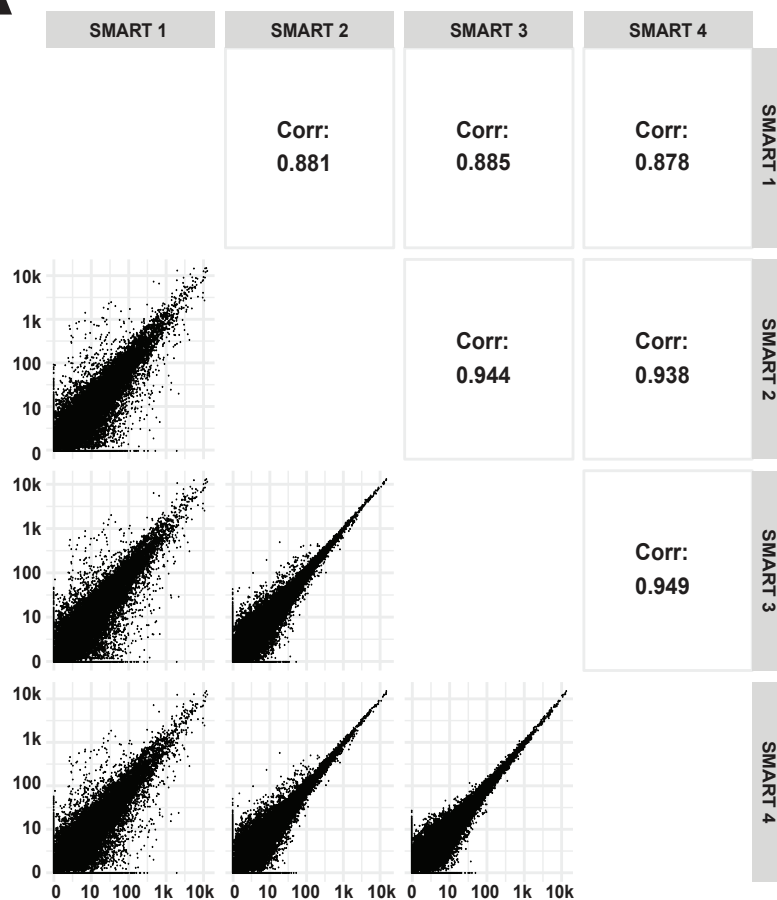**B**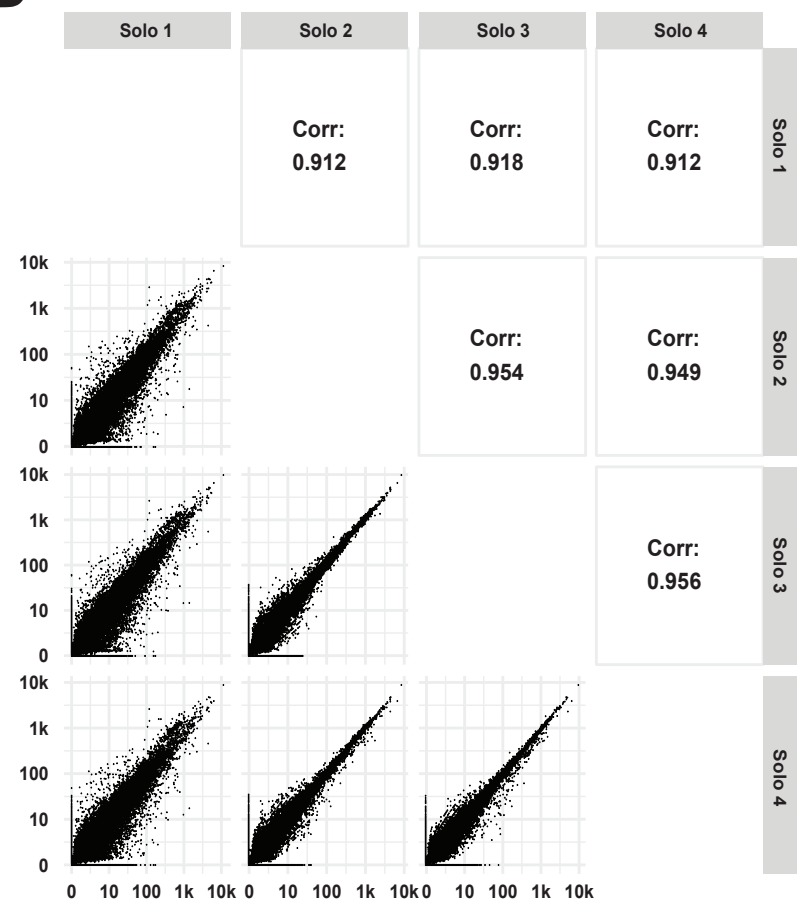**C****All Genes**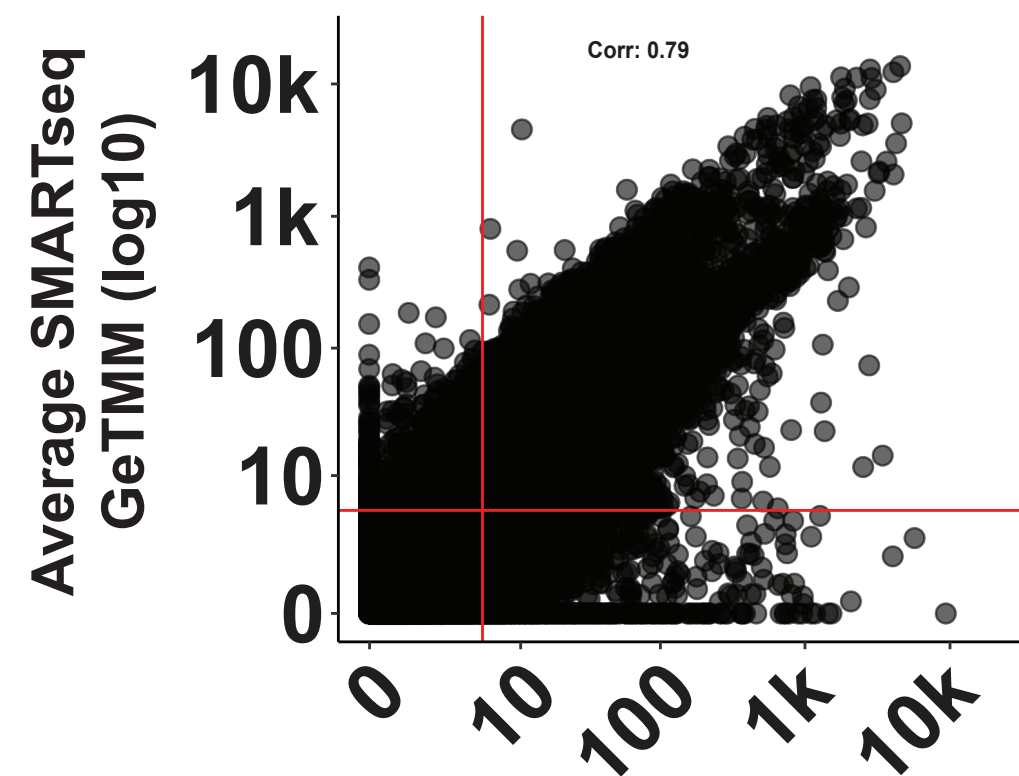**D****Protein Coding**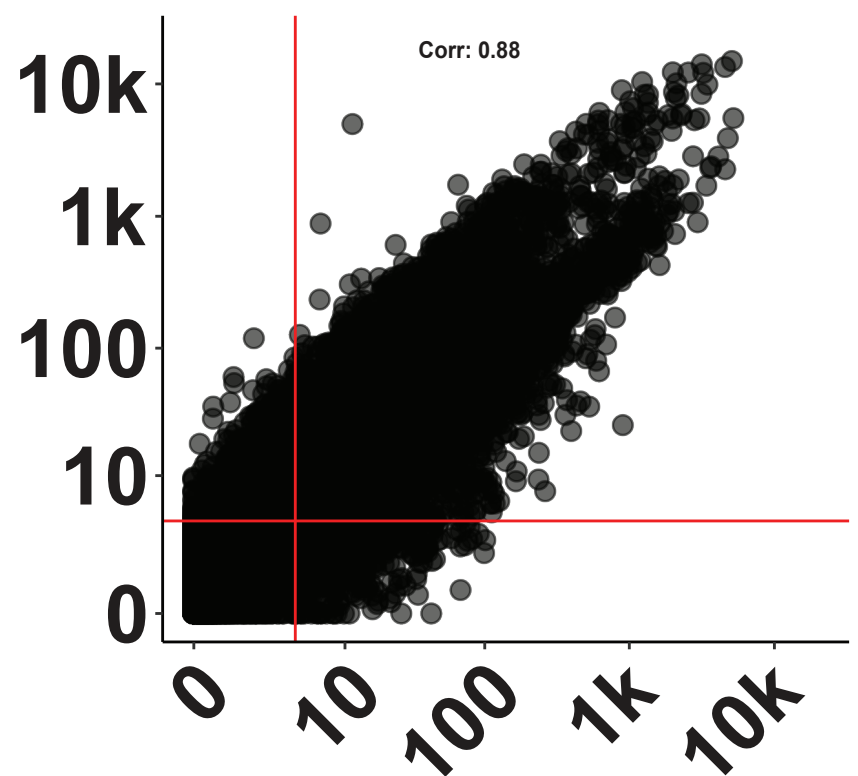**Average SoLo GeTMM (log10)**

**Figure S1: GeTMM values correlate within and between techniques** A-B) Scatter plots with correlation values for all pairwise replicates within SMARTseq (A) and SoLo (B) samples. C-D) Scatter plots showing averaged log10 GeTMM values for SoLo and SMARTseq samples using all genes (C), and just protein coding genes (D), red lines indicate 5 GeTMM.
