# Supplementary material
Source: publisher figshare collection journal article supplement (https://gsajournals.figshare.com/articles/dataset/_/14394353)
Supplement: Supplementary file 3 [file 1]

| sample name       | total rna (ng) | RIN | Total read pairs | Total Mapped | Total Mapped, deduplicated | % uniquely mapped | % rRNA after deduplication | DNase treated? | Biological replicate | Final library cDNA yields (ng) |
|-------------------|----------------|-----|------------------|--------------|----------------------------|-------------------|----------------------------|----------------|----------------------|--------------------------------|
| <b>SMARTseq 1</b> | 1.508          | 9.8 | 31767947         | 25142260     | 7935521                    | 79.14348          | 1.708252                   | No             | 1                    | 3.68                           |
| <b>SMARTseq 2</b> | 1.160          | 9.5 | 40416985         | 25631426     | 5915352                    | 63.41746          | 2.315434                   | Yes            | 2                    | 3.00                           |
| <b>SMARTseq 3</b> | 3.600          | 9.9 | 37442564         | 24398942     | 7394695                    | 65.16365          | 2.194880                   | No             | 3                    | 4.36                           |
| <b>SMARTseq 4</b> | 1.230          | 9.8 | 36977605         | 23990669     | 5018616                    | 64.87892          | 2.223749                   | Yes            | 3                    | 3.68                           |
| <b>SoLo 1</b>     | 1.508          | 9.8 | 17969902         | 10483341     | 3860066                    | 58.33833          | 11.712460                  | No             | 1                    | 59.20                          |
| <b>SoLo 2</b>     | 1.160          | 9.5 | 17395388         | 10075674     | 3001022                    | 57.92152          | 15.558520                  | Yes            | 2                    | 60.00                          |
| <b>SoLo 3</b>     | 3.600          | 9.9 | 21456169         | 12216428     | 4393602                    | 56.93667          | 12.983270                  | No             | 3                    | 78.00                          |
| <b>SoLo 4</b>     | 1.230          | 9.8 | 15559476         | 9323351      | 3010153                    | 59.92073          | 12.886540                  | Yes            | 3                    | 60.60                          |

**Table S1: Sample metadata**
