# Supplementary material
Source: publisher figshare collection journal article supplement (https://gsajournals.figshare.com/articles/dataset/_/14394353)
Supplement: Supplementary file 4 [file 1]

| Dataset                                     | Developmental stage | Fluorescent reporter used                   | RNA input range | cDNA synthesis kit                                                     | Sequencing library prep kit                                            | Sequencing machine |
|---------------------------------------------|---------------------|---------------------------------------------|-----------------|------------------------------------------------------------------------|------------------------------------------------------------------------|--------------------|
| <b>SoLo</b>                                 | L4                  | otIs355<br>[rab-3(prom1)::<br>2xNLS-TagRFP] | 1.5-3.6 ng      | Tecan/Nugen<br>SoLo ovation                                            | Tecan/Nugen<br>SoLo ovation                                            | HiSeq 2500         |
| <b>SMARTseq</b>                             | L4                  | otIs355<br>[rab-3(prom1)::<br>2xNLS-TagRFP] | 1.5-3.6 ng      | Takara<br>SMARTseq V4                                                  | Illumina Nextera<br>XT                                                 | HiSeq 2500         |
| <b>Kaletsky et al.,<br/>2018 (neuronal)</b> | Day 1 Adult         | otIs45<br>[Punc-119::GFP]                   | 10-100 ng       | Tecan/Nugen<br>Ovation RNAseq<br>v2                                    | Tecan/Nugen<br>Encore NGS OR<br>Illumina TruSeq<br>DNA Sample<br>Prep  | HiSeq 2000         |
| <b>Kaletsky et al.,<br/>2018 (neuronal)</b> | Day 1 Adult         | otIs45<br>[Punc-119::GFP]                   | 10-100 ng       | Takara SMARTer<br>Stranded Total<br>RNA kit-pico<br>input<br>mammalian | Takara SMARTer<br>Stranded Total<br>RNA kit-pico<br>input<br>mammalian | HiSeq 2000         |

**Table S3: Comparison to Kaletsky et al., 2018 samples**
