# Supplementary material
Source: publisher figshare collection journal article supplement (https://gsajournals.figshare.com/articles/dataset/_/14394353)
Supplement: Supplementary file 5 [file 1]

| <b>Dataset</b>                                      | <b>Quintile 1<br/>(lowest 20%)</b> | <b>Quintile 2</b>            | <b>Quintile 3</b>            | <b>Quintile 4</b>            | <b>Quintile 5<br/>(highest 20%)</b> |
|-----------------------------------------------------|------------------------------------|------------------------------|------------------------------|------------------------------|-------------------------------------|
| <b>SMARTseq dispersion</b>                          | mean: 2.05<br>median: 1.606        | mean: 0.984<br>median: 0.66  | mean: 0.465<br>median: 0.304 | mean: 0.277<br>median: 0.181 | mean: 0.204<br>median: 0.134        |
| <b>SoLo dispersion</b>                              | mean: 0.686<br>median: 0.369       | mean: 0.367<br>median: 0.160 | mean: 0.169<br>median: 0.081 | mean: 0.104<br>median: 0.058 | mean: 0.092<br>median: 0.056        |
| <b>SMARTseq normalized confidence interval size</b> | mean: 2.469<br>median: 2.417       | mean: 1.876<br>median: 1.900 | mean: 1.369<br>median: 1.236 | mean: 1.053<br>median: 0.901 | mean: 0.841<br>median: 0.677        |
| <b>SoLo normalized confidence interval size</b>     | mean: 2.043<br>median: 1.995       | mean: 1.426<br>median: 1.270 | mean: 0.966<br>median: 0.776 | mean: 0.713<br>median: 0.573 | mean: 0.630<br>median: 0.503        |

**Table S2: Mean and Median variance in each quintile of gene expression**
